# Supplementary material for: Indium(iii) halides as exceptionally active, water-tolerant catalysts for cationic polymerization of styrenics
Source: Royal Society of Chemistry journal article supplement (doi:10.1039/c1py00145k), 2011-01-01
Supplement: c1py00145k.pdf [file c1py00145k.pdf]

Supporting information

for

**Indium(III) halides as exceptionally active, water-tolerant catalysts for cationic polymerization of styrenics**

Marc Bompart, Jérôme Vergnaud, Henri Strub, and Jean-François Carpentier

**I. Experimental section**

**II. Representative kinetic and thermic monitoring of the co-polymerization of styrene and  $\alpha$ -methylstyrene with the  $\text{InCl}_3/t\text{BuCl}$  system**

**III. NMR characterization of oligostyrenes produced from  $\text{InCl}_3/t\text{BuCl}$**

**IV. Representative GPC traces of oligomers**

**V.  $^{115}\text{In}$  NMR spectroscopy**

## I. Experimental section

### 1. General Methods and Materials

Styrene (St, 99%),  $\alpha$ -methyl-styrene ( $\alpha$ -MeSt, 98%), *p*-methylstyrene (*p*MeSt, 98%), indene (Ind, 95%), *p*-xylene (99%), 1-*p*-tolylethanol (98%), 1-indanol (99%), 1-bromophenethyl (99%), *tert*-butyl chloride (98%), diisopropylether (*i*Pr<sub>2</sub>O, 99%), indium(III) chloride (99.999%), and indium(III) bromide (99.999%) were purchased from Sigma-Aldrich, Acros or Strem chemicals and all used as received. The water content of the monomers and solvent was determined by the Karl-Fisher method and was in the ranges  $150 \pm 50$  ppm for styrene,  $100 \pm 50$  ppm for  $\alpha$ -methyl-styrene,  $90 \pm 30$  ppm for *p*-methylstyrene,  $180 \pm 50$  ppm for indene and  $100 \pm 30$  ppm for *p*-xylene; repeated controls indicated that these values did not change over the time period where investigations were carried out. All polymerization reactions were performed under air, in opened glass flasks.

### 2. Physical Methods

<sup>1</sup>H and <sup>13</sup>C NMR spectra of polymers were recorded on Bruker AC-200, AC-300, and AM-500 spectrometers in 5 mm NMR tubes. <sup>1</sup>H and <sup>13</sup>C chemical shifts are reported in ppm versus SiMe<sub>4</sub> and were determined by reference to the residual solvent resonances. Assignment of signals was carried out via multinuclear 1D (<sup>1</sup>H, <sup>13</sup>C{<sup>1</sup>H}) and 2D (<sup>1</sup>H-<sup>1</sup>H COSY, <sup>1</sup>H-<sup>13</sup>C HMBC and HMQC) NMR experiments.

Gel Permeation chromatography (GPC) of polymers was performed independently on two apparatuses: (a) in THF (flow rate: 1.0 mL.min<sup>-1</sup>) at 23 °C using a Polymer Laboratories PL50 apparatus equipped with PLgel 5  $\mu$ m MIXED-C 300  $\times$  7.5 mm columns, and combined RI and Dual angle LS (PL-LS 45/90°) detectors. (b) in THF (flow rate: 1.0 mL.min<sup>-1</sup>) at 35 °C using a Polymer Laboratories PL50 apparatus equipped with four columns dedicated to lower molecular weight materials: 2 mixed D columns, one 100 Å column and one 50 Å column, and combined RI/UV detectors. In both cases, the number average molecular masses ( $M_n$ ) and polydispersity index ( $M_w/M_n$ ) of the polymers were calculated with reference to a universal calibration vs. polystyrene standards ( $M_w$ : 377,400; 188,700; 96,000; 46,500; 19,720; 9,920; 4,490; 2,360; 1,180; 580 and 162 g.mol<sup>-1</sup>).

Differential scanning calorimetry (DSC) analyses were performed on a Mettler Toledo DSC1/700 or Setaram DSC 131 apparatus, under continuous flow of helium (25 mL.min<sup>-1</sup>), using aluminum capsules. The thermograms were recorded according to the following cycle: -10 °C to +100 °C at 10 °C.min<sup>-1</sup>; the  $T_g$  values are reported for the second cycle.

$^{115}\text{In}$  NMR spectra were obtained with a Bruker Avance III 400 MHz spectrometer with a 5 mm BBOF probe operating at 87.7 MHz. The instrument was internally locked onto the deuterium resonance of  $\text{D}_2\text{O}$  introduced as a capillary in NMR tubes. All samples were studied as *ca.* 40  $\text{mmol}\cdot\text{L}^{-1}$  solutions (7 mg  $\text{InCl}_3$  in *ca.* 0.8 mL  $\text{O}i\text{Pr}_2$ ) at 23 °C. The experimental conditions were as follows: 2-14,000 scans, time domain: 32K, spectral window:  $-800$  to  $+200$  ppm; acquisition time: 0.18s, additional relaxation time: 0.2 s. Chemical shifts were externally referenced via the Bruker software to the resonance of  $\text{In}(\text{H}_2\text{O})_6^{3+}$ .

### 3. General Procedure for Polymerization of Monomers

*a) Polymerization of p-methylstyrene.* In a typical experiment (Table 1, entry 4),  $\text{InBr}_3$  (4.0 mg, 11.3  $\mu\text{mol}$ ), *p*MeSt (75 mL, 0.56 mol) and *p*-xylene (75 mL) were charged under air in a 250 mL round bottom flask containing a magnetic stir bar. *t*BuCl (2.6 mL, 28.2 mmol, 5 mol% *vs.* *p*MeSt) was added dropwise to the mixture and the vessel was heated in an oil bath preset at the required temperature (typically 60 °C) under stirring. The reaction was cooled to room temperature and quenched by addition of methanol (*ca.* 5 mL). The conversion was determined by  $^1\text{H}$  NMR analysis of the crude solution mixture. The polymer was isolated as colorless gummy solid by evaporation of the solvent at 220 °C under vacuum with a Kugelrohr apparatus and was subsequently analyzed by NMR and GPC.

*b) Co-polymerization of  $\alpha$ -methylstyrene and styrene.* In a typical experiment (Table 2, entry 21), styrene (0.97 mL, 8.5 mmol),  $\alpha$ -MeSt (2.6 mL, 19.7 mmol) and *p*-xylene (2.5 mL) were charged under air in a glass flask equipped with a magnetic stir bar. Then,  $\text{PhCHBrMe}$  (19.3  $\mu\text{L}$ , 0.14 mmol) was added to the mixture, followed by 1.0 mL of a solution prepared by dissolving  $\text{InBr}_3$  (4.0 mg, 11.3  $\mu\text{mol}$ ) in a mixture of diisopropylether (200  $\mu\text{L}$ ) and *p*-xylene (19.8 mL) (*i.e.*, 0.2 mg, 0.556  $\mu\text{mol}$   $\text{InBr}_3$ ). The resulting clear mixture was heated at 60 °C overnight by immersing the reaction vessel in an oil bath preset at the desired temperature. Aliquots of the solution were sampled to determine the conversion by  $^1\text{H}$  NMR spectroscopy. After a given time period, the reaction was cooled to room temperature and quenched by adding solid calcium carbonate (*ca.* 0.5 g). The resultant mixture was filtered, the residue was washed with *p*-xylene and the clear solution was concentrated under vacuum at 220 °C under vacuum with a Kugelrohr apparatus to give a colorless gummy solid.

## II. Representative kinetic and thermic monitoring of the co-polymerization of styrene and $\alpha$ -methylstyrene with the $\text{InCl}_3/t\text{BuCl}$ system

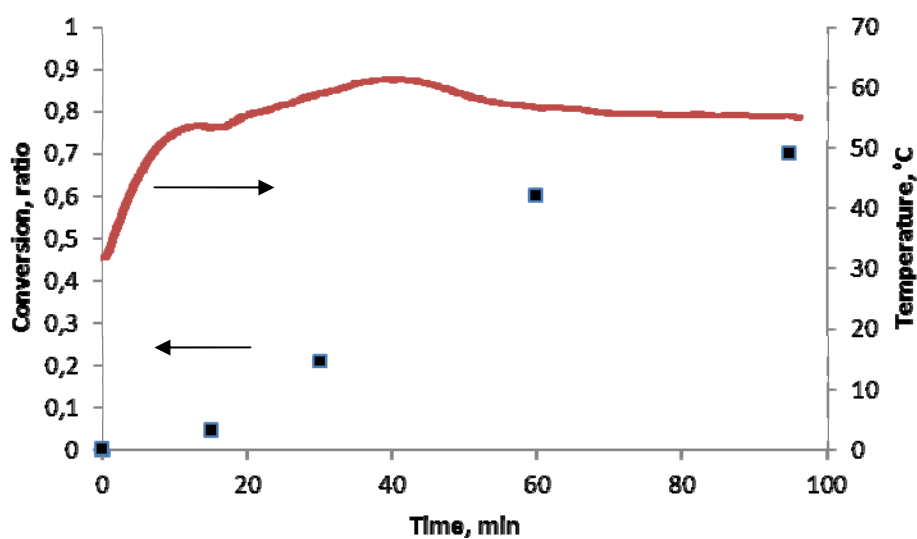

**Figure S1.** Representative kinetic and thermic monitoring of the co-polymerization of styrene and  $\alpha$ -methylstyrene ( $\text{Sty}_{70}\text{-}\alpha\text{-MeSty}_{30}$ ) with the  $\text{InCl}_3/t\text{BuCl}$  system (100 ppm  $\text{InCl}_3$ , 1.0 mol%  $t\text{BuCl}$ , 60 °C) (Table 2, entry 26).

### III. NMR characterization of oligostyrenes produced from the homopolymerization of styrene with the $\text{InCl}_3/t\text{BuCl}$ system

Note: the oligostyrenes used for the NMR analyses shown hereafter were purposely produced for chain-end analysis, following protocols similar to those employed for the production of oligo(*p*-methylstyrene)s.

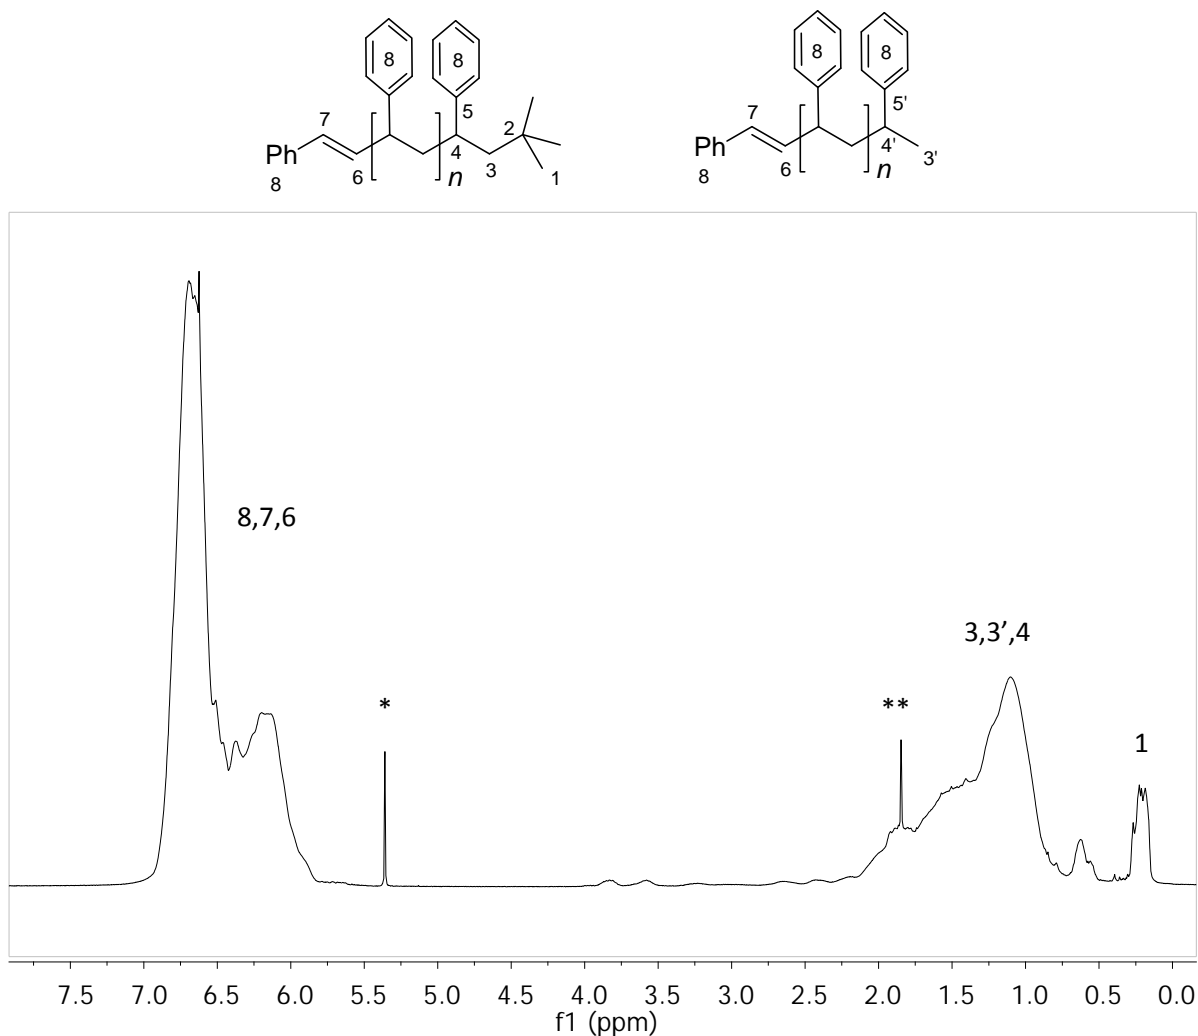

**Figure S2.**  $^1\text{H}$  NMR spectrum (500 MHz,  $\text{C}_2\text{D}_2\text{Cl}_4$ , 23 °C) of oligostyrenes produced from the homopolymerization of styrene with the  $\text{InCl}_3/t\text{BuCl}$  system (20 ppm In, 1 mol% *t*BuCl, 60 °C) (\* and \*\* stand for the resonance of  $\text{C}_2\text{D}_2\text{Cl}_4$  and residual *p*-xylene, respectively)

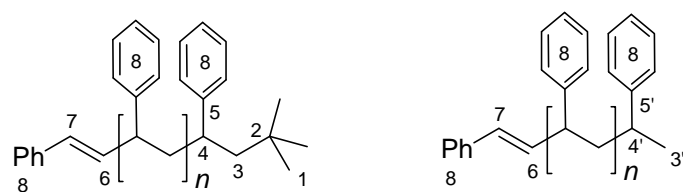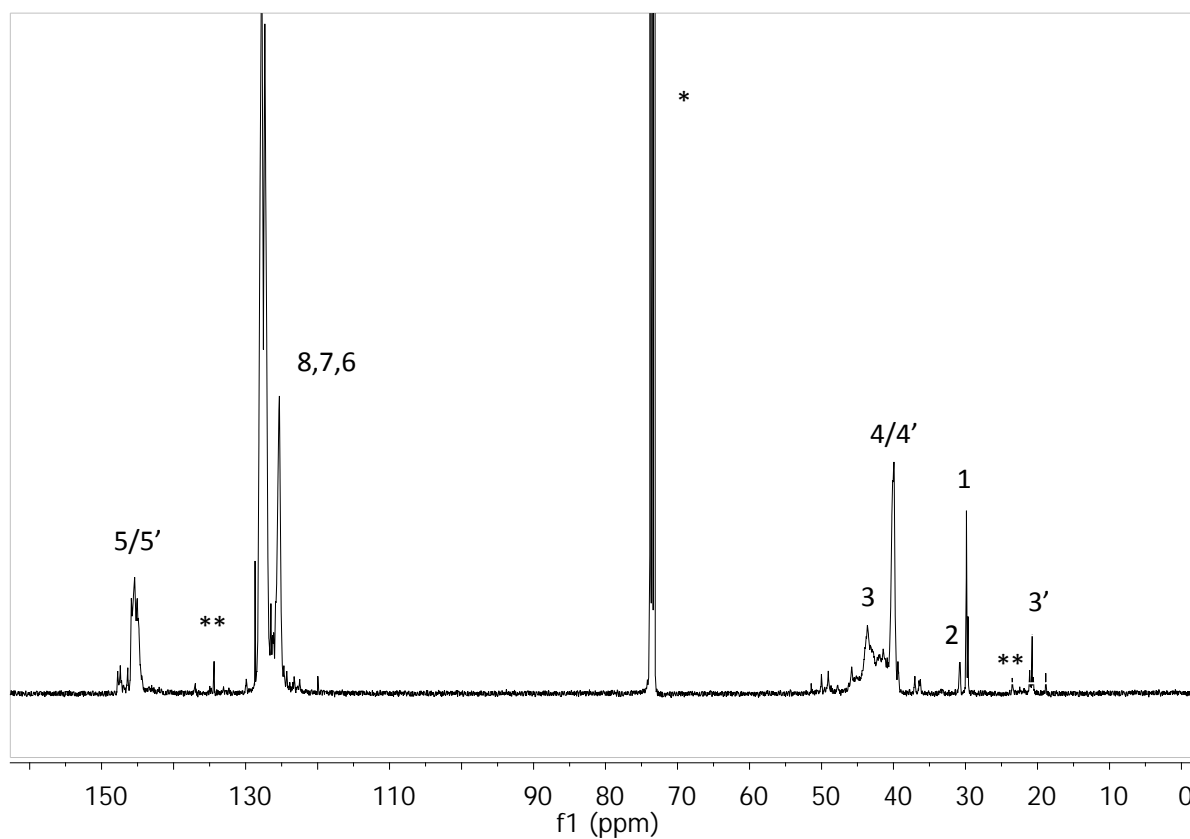

**Figure S3.**  $^{13}\text{C}\{^1\text{H}\}$  NMR spectrum (500 MHz,  $\text{C}_2\text{D}_2\text{Cl}_4$ , 23 °C) of oligostyrenes produced from the homopolymerization of styrene with the  $\text{InCl}_3/t\text{BuCl}$  system (20 ppm In, 1 mol%  $t\text{BuCl}$ , 60 °C) (\* and \*\* stand for the resonance of  $\text{C}_2\text{D}_2\text{Cl}_4$  and residual  $p$ -xylene, respectively)

#### IV. Representative GPC traces of oligomers

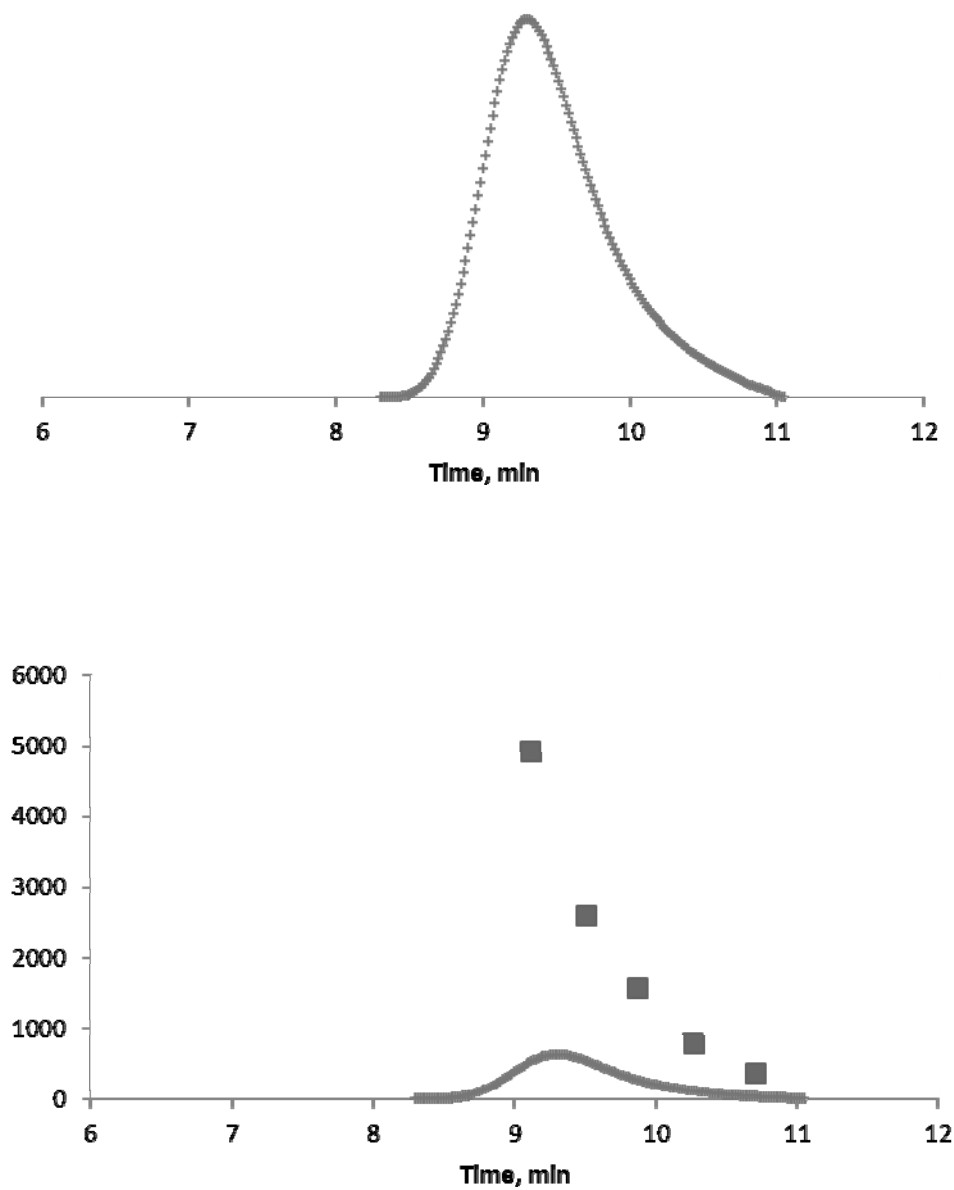

**Figure S4.** GPC traces (without and with the calibration curve) of a polyindene prepared from  $\text{InBr}_3$  (100 ppm), 1.0 mol% PhCHBrMe, at 60 °C;  $M_n = 2100 \text{ g}\cdot\text{mol}^{-1}$ ,  $M_w/M_n = 1.7$  (Table 1, entry 12).

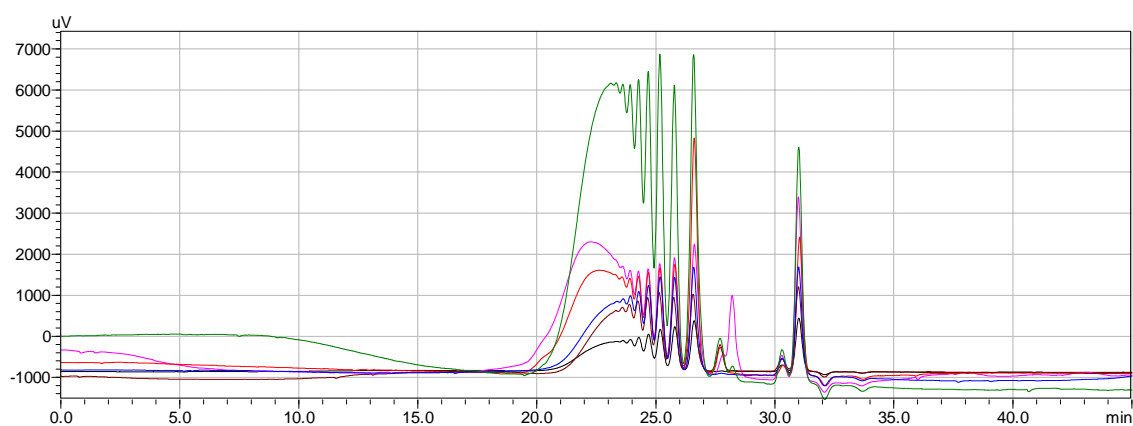

**Figure S5.** GPC traces of poly(styrene-*co*- $\alpha$ -methylstyrene) resins prepared from :

1: ref#M1: InCl<sub>3</sub> (100 ppm), 1 mol% *t*BuCl, Sty<sub>70</sub>- $\alpha$ -MeSt<sub>30</sub>, 60 °C (industrial grade reagents)

2: ref#67 1: InCl<sub>3</sub> (100 ppm), 1 mol% PhCHBrMe, Sty<sub>50</sub>- $\alpha$ -MeSt<sub>50</sub>, 45 °C (industrial grade reagents)

3: ref#67 2: InCl<sub>3</sub> (100 ppm), 1 mol% *t*BuCl, Sty<sub>50</sub>- $\alpha$ -MeSt<sub>50</sub>, 60 °C (industrial grade reagents)

4: ref#66 3: InCl<sub>3</sub> (100 ppm), 1 mol% *t*BuCl, Sty<sub>40</sub>- $\alpha$ -MeSt<sub>60</sub>, 60 °C (industrial grade reagents)

5: ref#68 4: InCl<sub>3</sub> (100 ppm), 1 mol% PhCHBrMe, Sty<sub>70</sub>- $\alpha$ -MeSt<sub>30</sub>, 45 °C (industrial grade reagents)

6: ref#w85: BF<sub>3</sub> (200-350 ppm) / H<sub>2</sub>O (150 ppm), Sty<sub>30</sub>- $\alpha$ -MeSt<sub>70</sub>, 10 °C (industrial grade reagents)



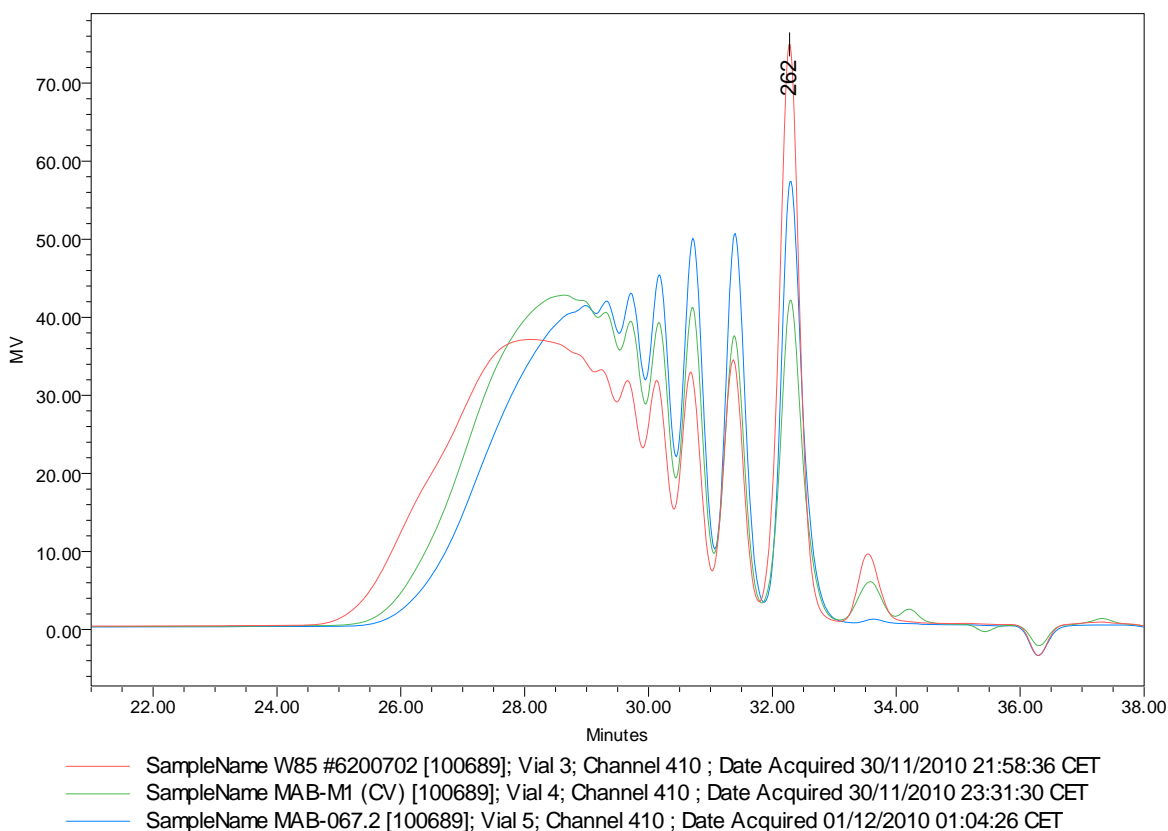

**Peak Results**

|   | SampleName            | Mn  | Mw   | Mz   | Poly dispersity | MP  |
|---|-----------------------|-----|------|------|-----------------|-----|
| 1 | MAB-067.2 [100689]    | 549 | 826  | 1265 | 1.50            | 261 |
| 2 | MAB-M1 (CV) [100689]  | 602 | 962  | 1518 | 1.60            | 963 |
| 3 | W85 #6200702 [100689] | 588 | 1120 | 2044 | 1.91            | 262 |

**Figure S6.** Details of GPC traces of poly(styrene-*co*- $\alpha$ -methylstyrene) resins prepared from :

1: ref#M1: InCl<sub>3</sub> (100 ppm), 1 mol% *t*BuCl, Sty<sub>70</sub>- $\alpha$ -MeSt<sub>30</sub>, 60 °C (industrial grade reagents)

3: ref#67 2: InCl<sub>3</sub> (100 ppm), 1 mol% *t*BuCl, Sty<sub>50</sub>- $\alpha$ -MeSt<sub>50</sub>, 60 °C (industrial grade reagents)

6: ref#w85: BF<sub>3</sub> (200-350 ppm) / H<sub>2</sub>O (150 ppm), Sty<sub>30</sub>- $\alpha$ -MeSt<sub>70</sub>, 10 °C (industrial grade reagents)

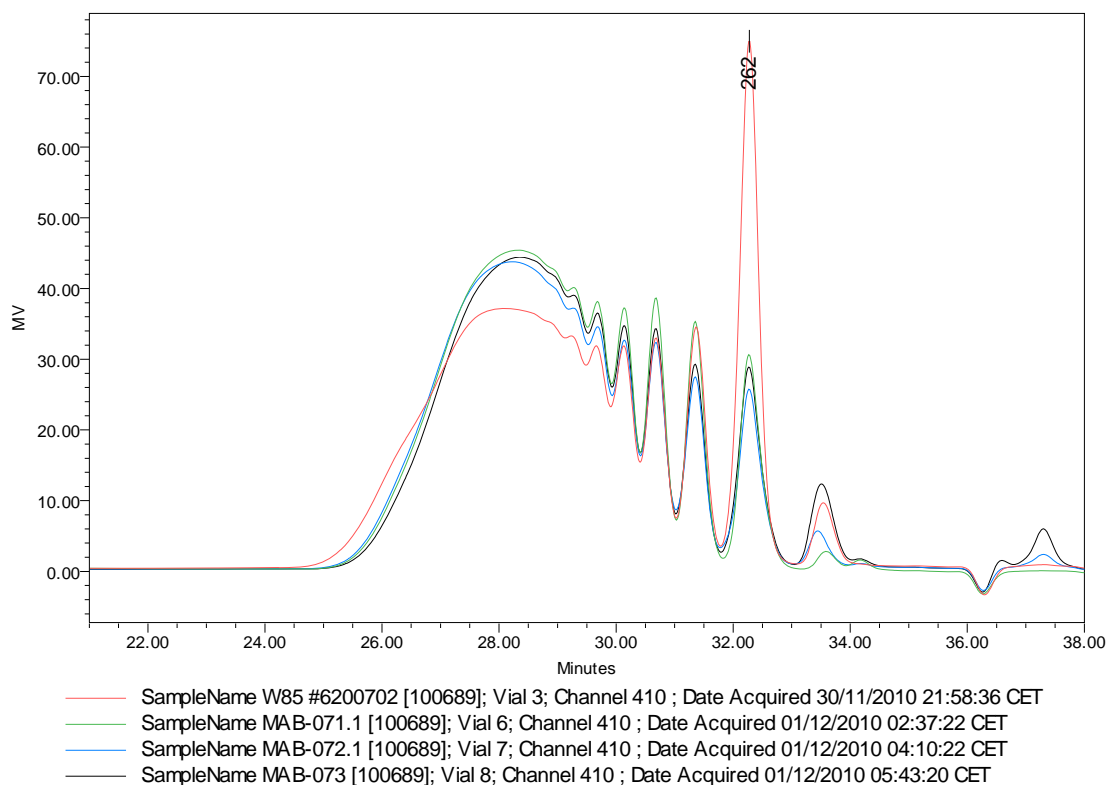

**Peak Results**

|   | SampleName            | Mn  | Mw   | Mz   | Poly dispersity | MP   |
|---|-----------------------|-----|------|------|-----------------|------|
| 1 | MAB-071.1 [100689]    | 687 | 1100 | 1688 | 1.60            | 1108 |
| 2 | MAB-072.1 [100689]    | 698 | 1139 | 1753 | 1.63            | 1166 |
| 3 | MAB-073 [100689]      | 642 | 1061 | 1635 | 1.65            | 1090 |
| 4 | W85 #6200702 [100689] | 588 | 1120 | 2044 | 1.91            | 262  |

**Figure S7.** Reproducibility results: Details of GPC traces of poly(styrene-*co*- $\alpha$ -methylstyrene) resins prepared from :

1: ref#71.1: InCl<sub>3</sub> (100 ppm), 1 mol% *t*BuCl, Sty<sub>60</sub>- $\alpha$ -MeSt<sub>40</sub>, 50 °C (industrial grade reagents)

2: ref#72 1: InCl<sub>3</sub> (100 ppm), 1 mol% PhCHBrMe, Sty<sub>60</sub>- $\alpha$ -MeSt<sub>40</sub>, 50 °C (industrial grade reagents)

3: ref#73.1: InCl<sub>3</sub> (100 ppm), 1 mol% *t*BuCl, Sty<sub>40</sub>- $\alpha$ -MeSt<sub>60</sub>, 50 °C (industrial grade reagents)

4: ref#w85: BF<sub>3</sub> (200-350 ppm) / H<sub>2</sub>O (150 ppm), Sty<sub>30</sub>- $\alpha$ -MeSt<sub>70</sub>, 10 °C (industrial grade reagents)

## VI. $^{115}\text{In}$ NMR spectroscopy

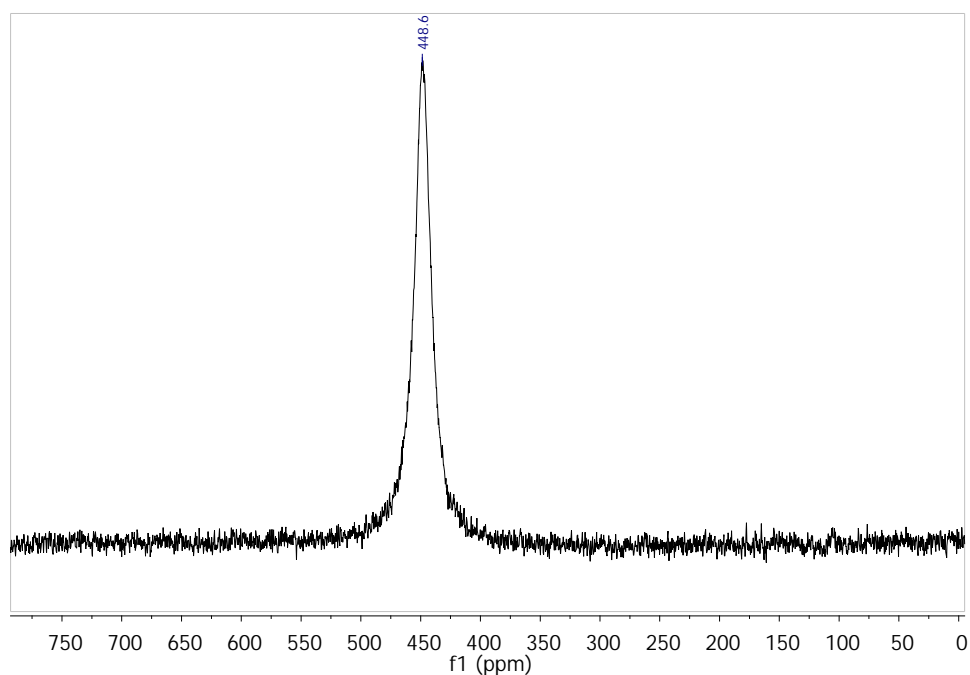

**Figure S8.**  $^{115}\text{In}$  NMR spectrum (87.7 MHz, 23 °C) of a  $\text{InCl}_4^-$  solution prepared from a 1:1 mixture of  $\text{InCl}_3$  and  $\text{HCl}$  (2M in  $\text{Et}_2\text{O}$ ) in  $i\text{Pr}_2\text{O}$  ( $[\text{In}] = 40 \text{ mmol.L}^{-1}$ ).

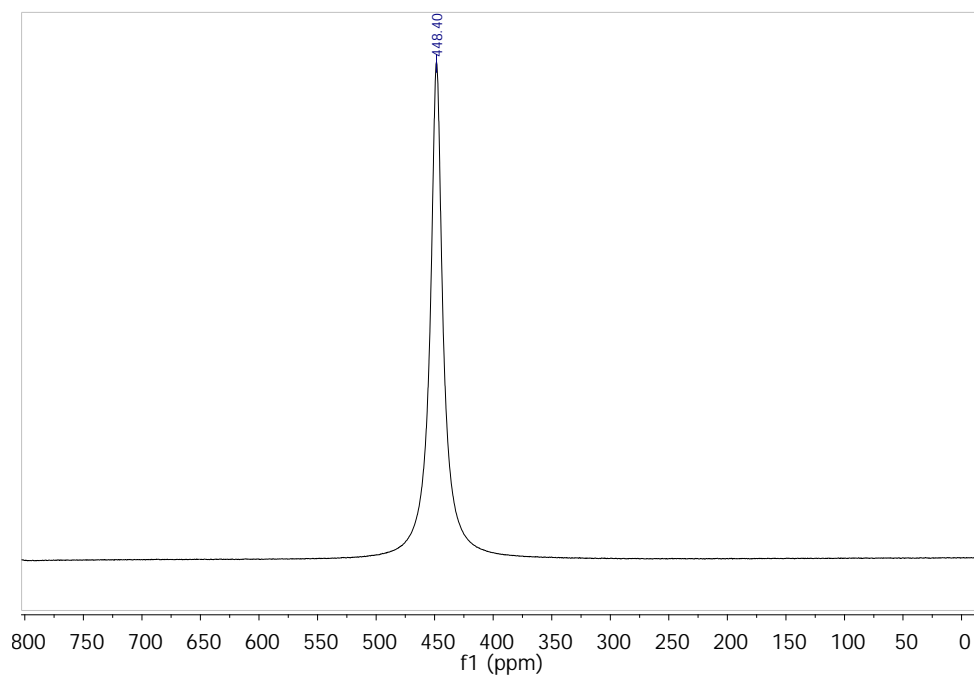

**Figure S9.**  $^{115}\text{In}$  NMR spectrum (87.7 MHz, 23 °C) of a  $\text{InCl}_4^-$  solution prepared from a 1:5 mixture of  $\text{InCl}_3$  and  $\text{HCl}$  (2M in  $\text{Et}_2\text{O}$ ) in  $i\text{Pr}_2\text{O}$  ( $[\text{In}] = 40 \text{ mmol.L}^{-1}$ ).

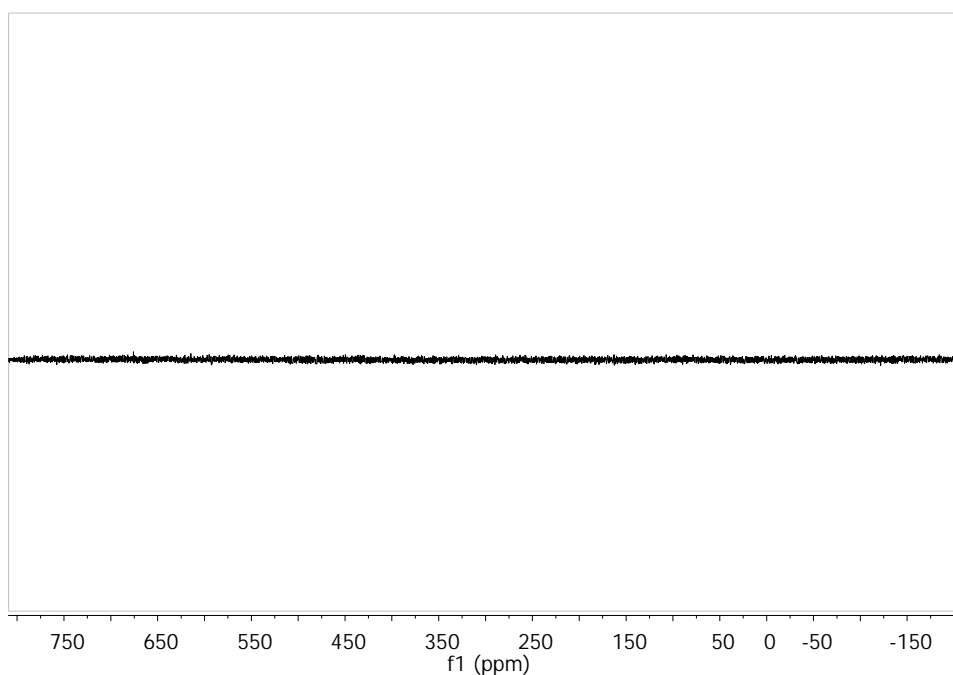

**Figure S10.**  $^{115}\text{In}$  NMR spectrum (87.7 MHz, 23 °C) of a solution of  $\text{InBr}_3$  in  $i\text{Pr}_2\text{O}$  ( $[\text{In}] = 40 \text{ mmol.L}^{-1}$ ).

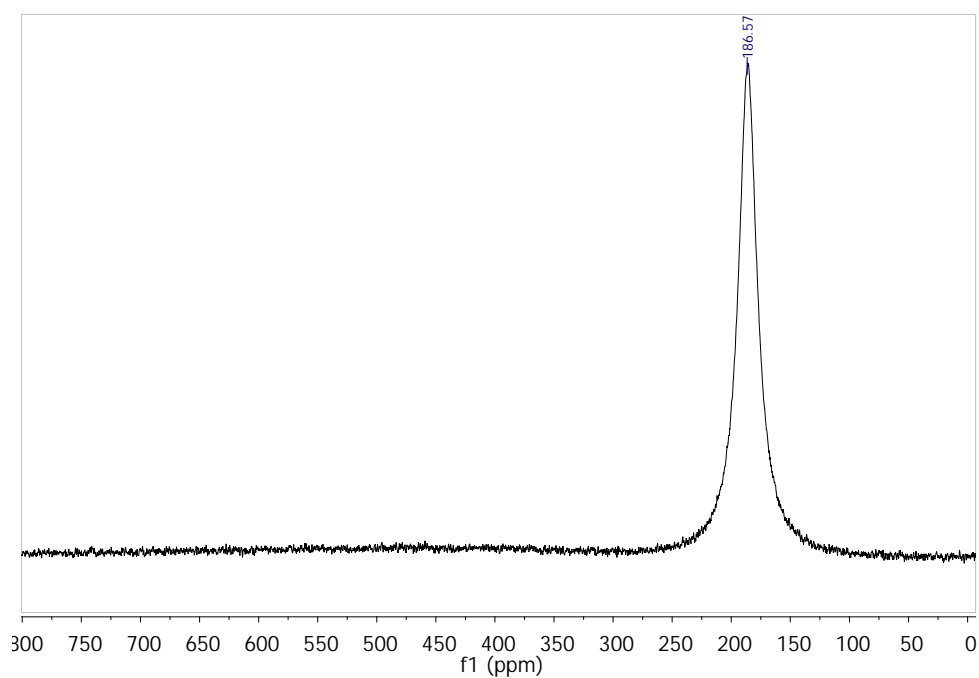

**Figure S11.**  $^{115}\text{In}$  NMR spectrum (87.7 MHz, 23 °C) of a 1:1 mixture of  $\text{InBr}_3$  and  $\text{PhChBrMe}$  in  $i\text{Pr}_2\text{O}$  ( $[\text{In}] = 40 \text{ mmol.L}^{-1}$ ) after 12 h at 23 °C.

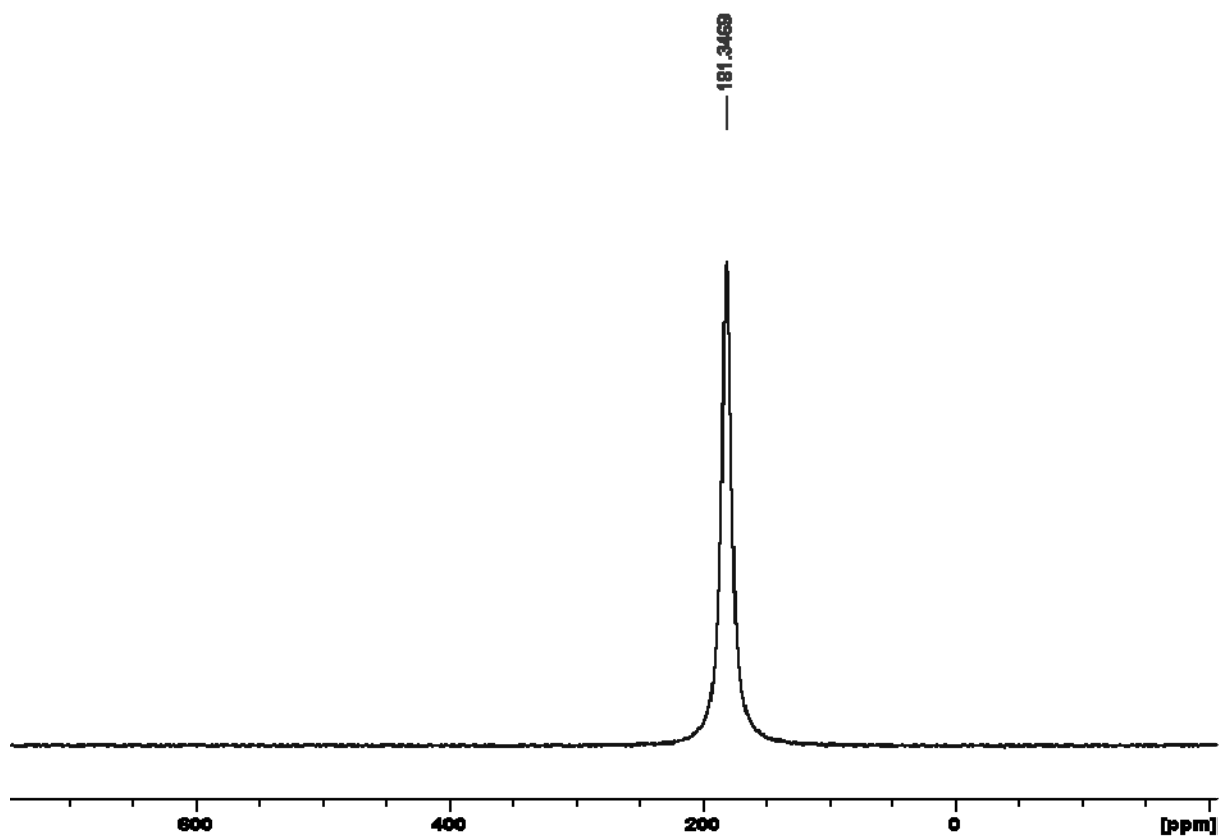

**Figure S12.**  $^{115}\text{In}$  NMR spectrum (87.7 MHz, 23 °C) of a  $\text{InBr}_4^-$  solution prepared from a 1:1 mixture of  $\text{InBr}_3$  and  $\text{HBr}$  (20% aq) in  $i\text{Pr}_2\text{O}$  ( $[\text{In}] = 40 \text{ mmol.L}^{-1}$ ).
